# Supplementary material for: Chemotypes and Biomarkers of Seven Species of New Caledonian Liverworts from the Bazzanioideae Subfamily
Source: PubMed Central journal article supplement (PMC6100190; doi:10.3390/molecules23061353), 2018-06-05
Supplement: molecules-23-01353-s001.pdf [file molecules-23-01353-s001.pdf]

Article

# **Supplementary Materials: Chemotypes and biomarkers of seven species of New Caledonian Liverworts from the Bazzanioideae subfamily**

Benjamin Métoyer, Nicolas Lebouvier, Edouard Hnawia, Gaëtan Herbette, Louis Thouvenot, Yoshinori Asakawa, Mohammed Nour and Phila Raharivelomanana

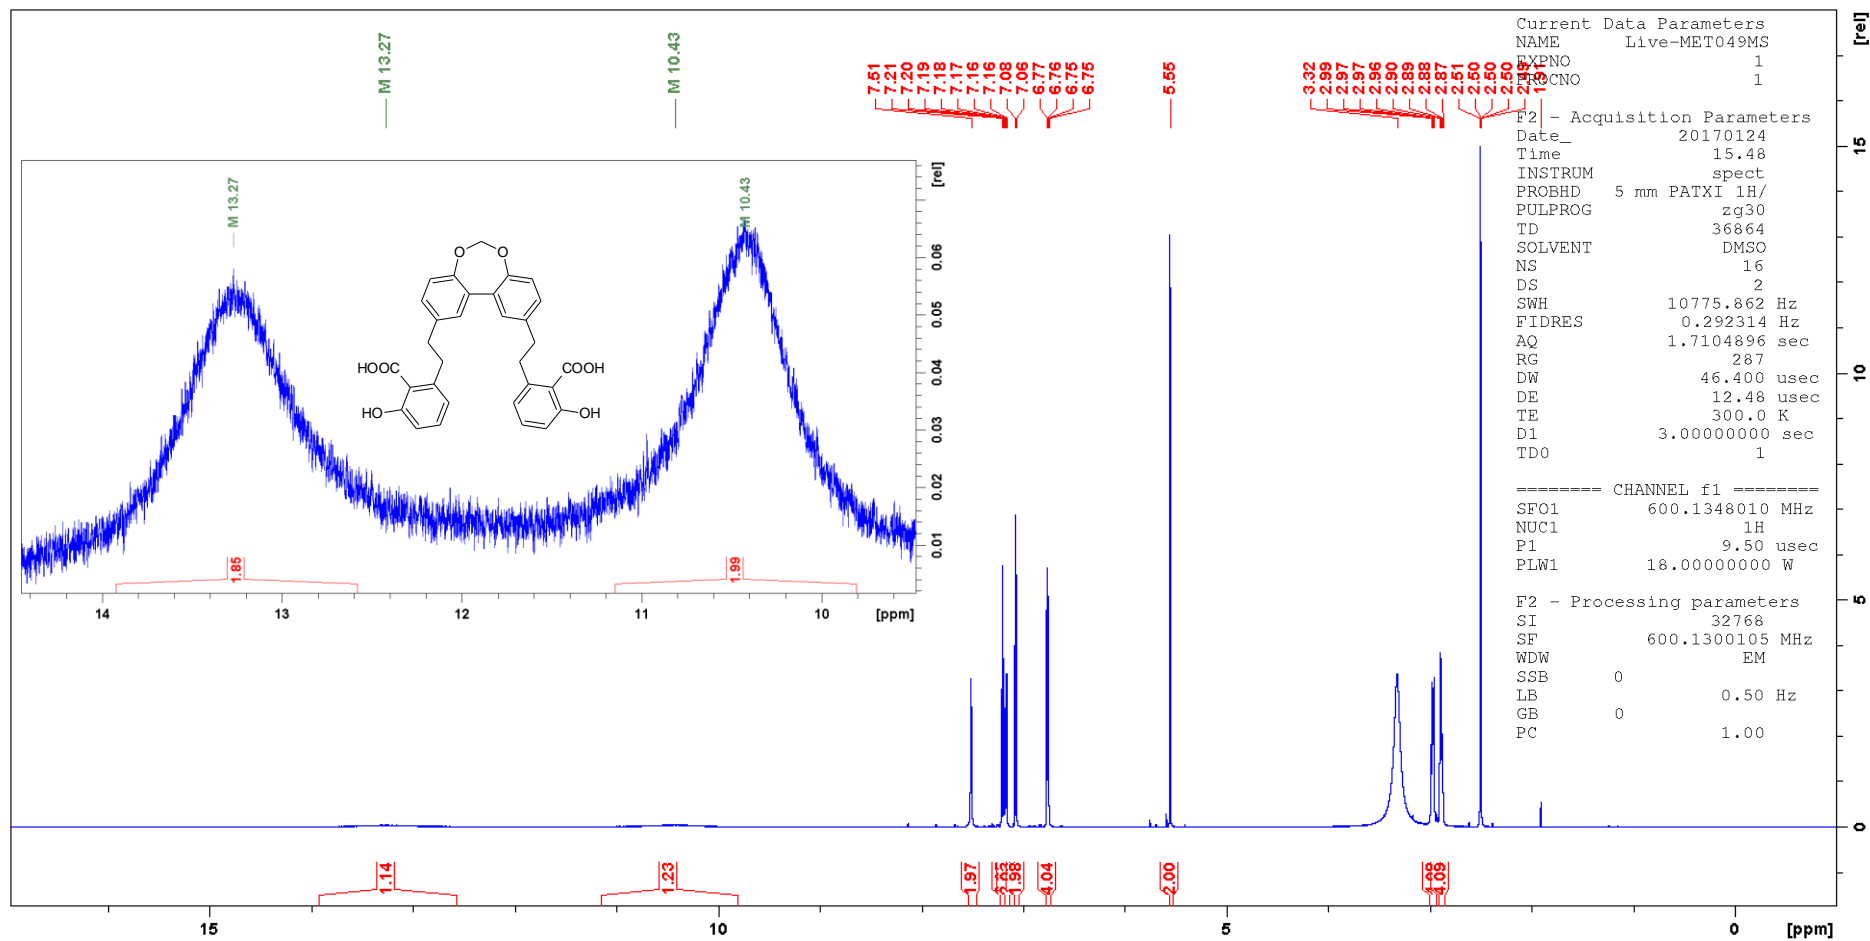

Figure S1. <sup>1</sup>H-NMR (600 MHz, DMSO-d<sub>6</sub>) spectrum of compound 51 (full spectrum).

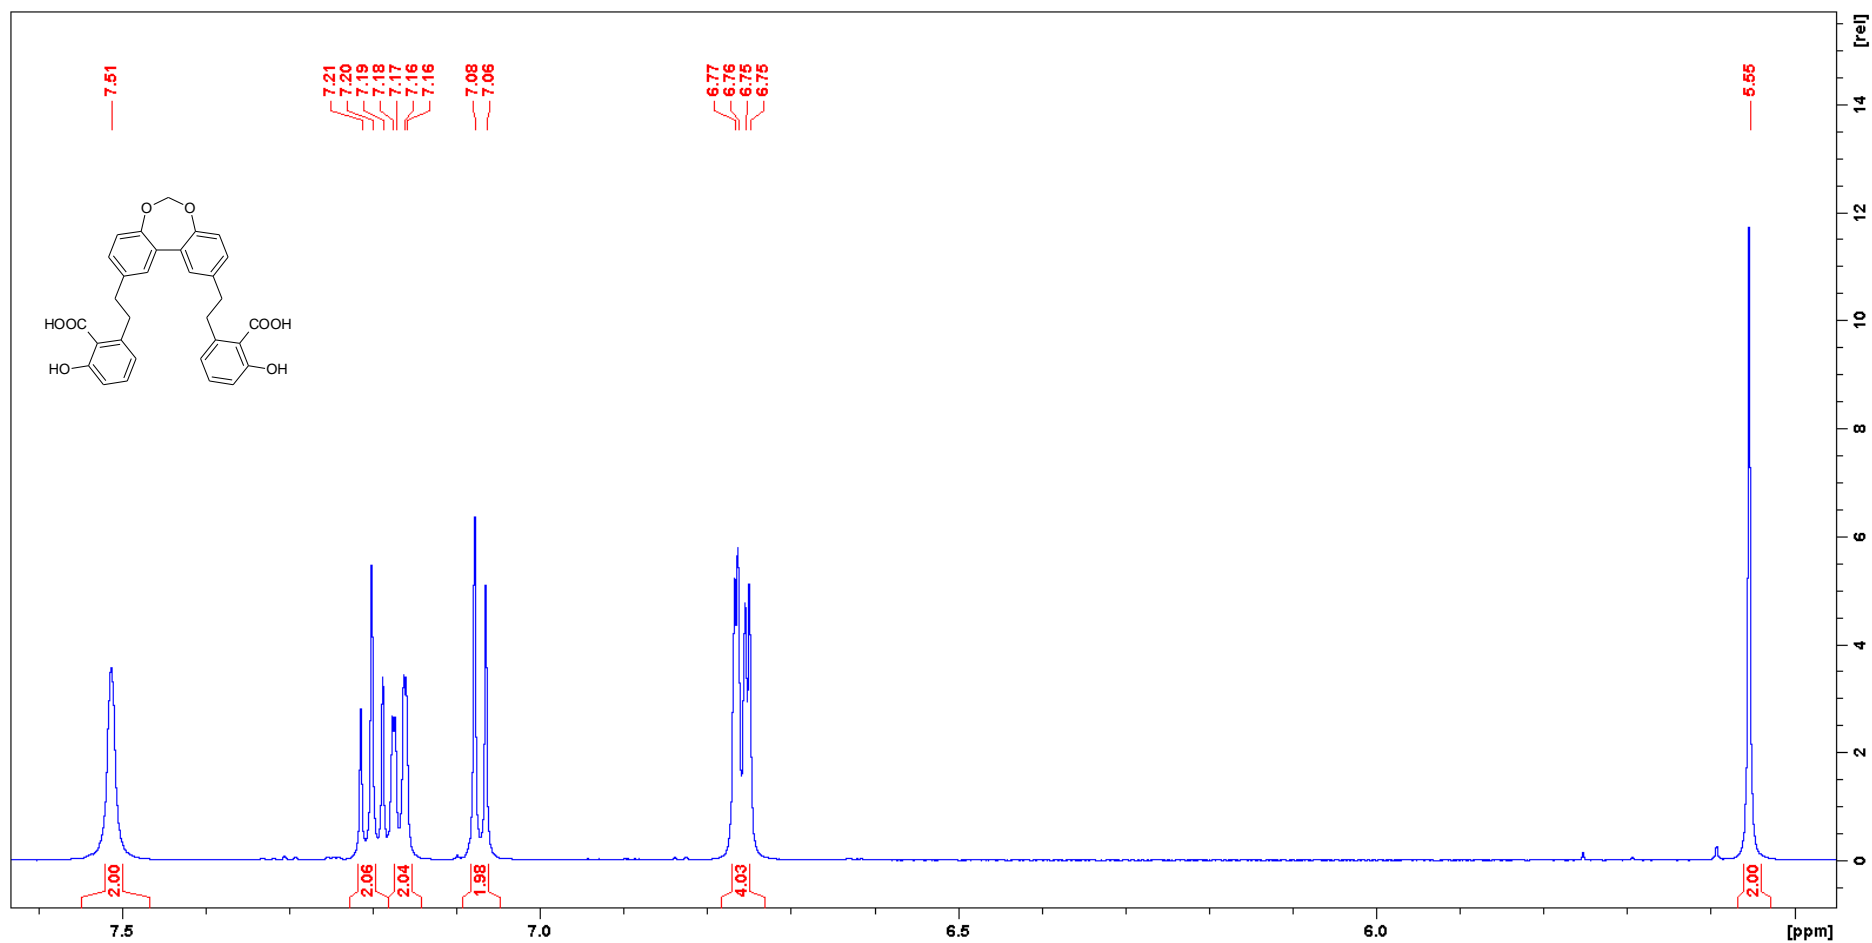

Figure S2. <sup>1</sup>H-NMR (600 MHz, DMSO-d<sub>6</sub>) spectrum of compound 51 (from 5 to 6 ppm).

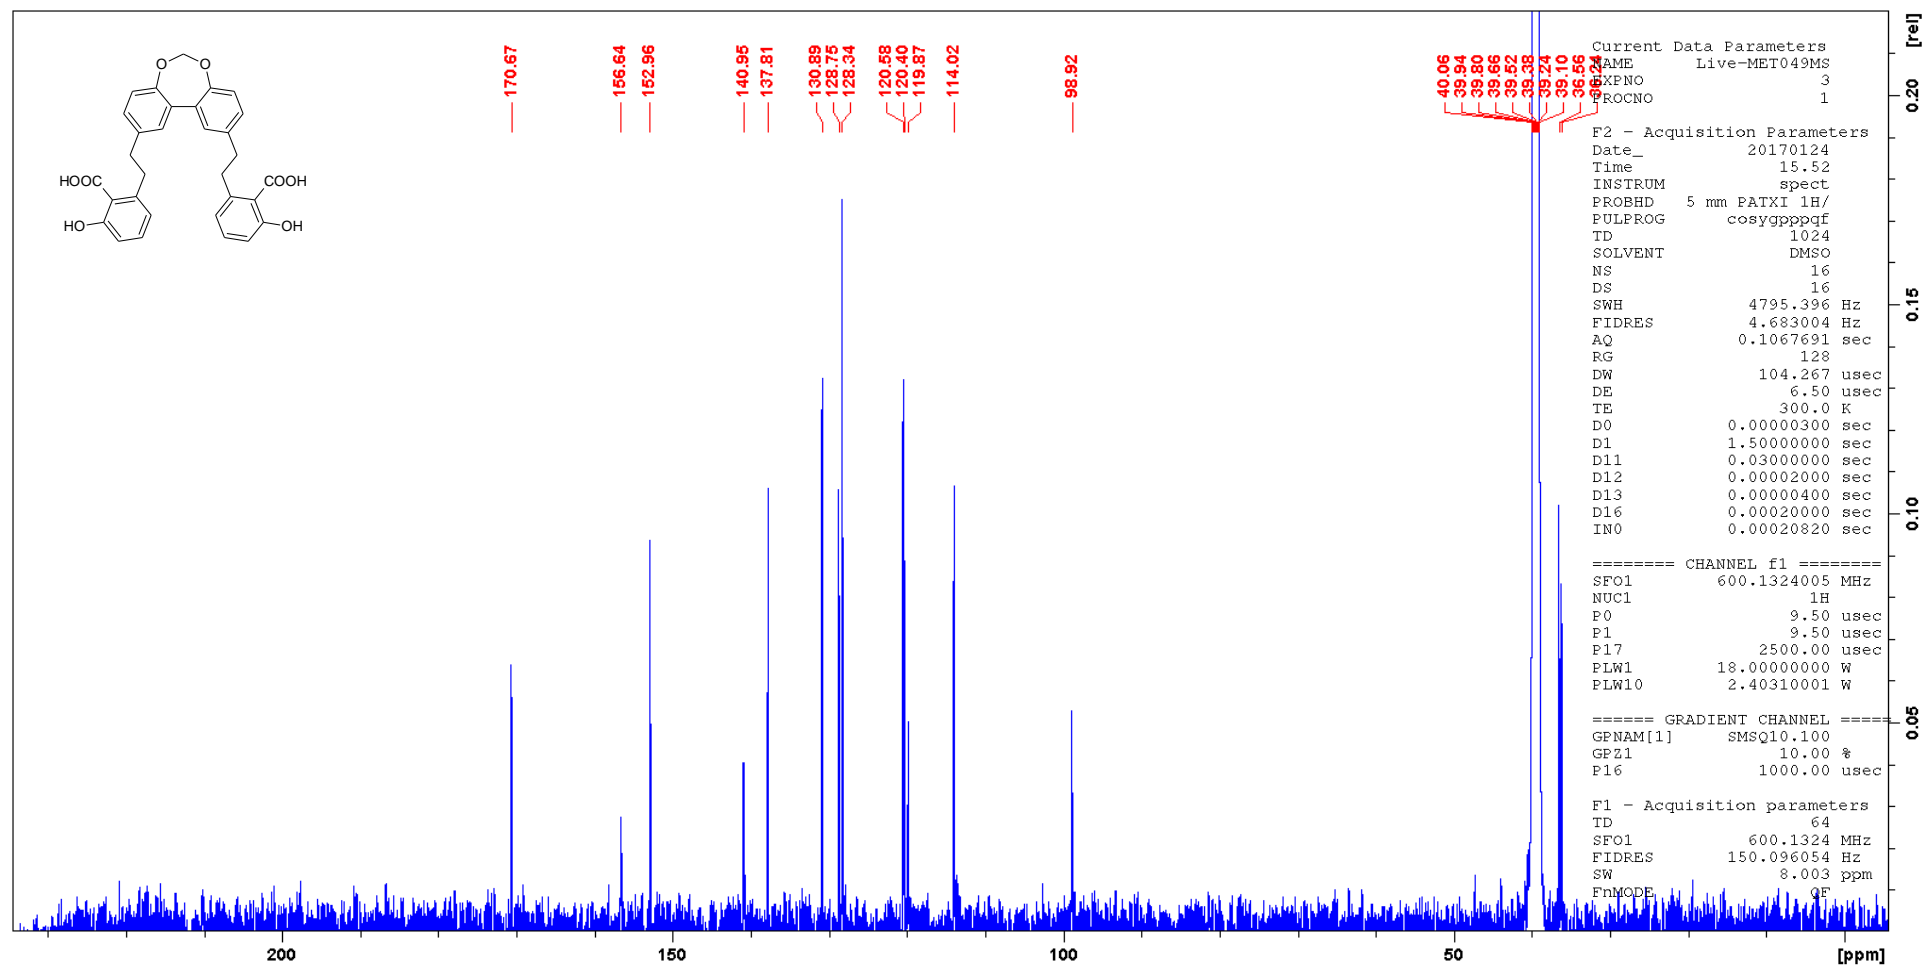

Figure S3. <sup>13</sup>C-NMR (150 MHz, DMSO-d<sub>6</sub>) spectrum of compound 51.

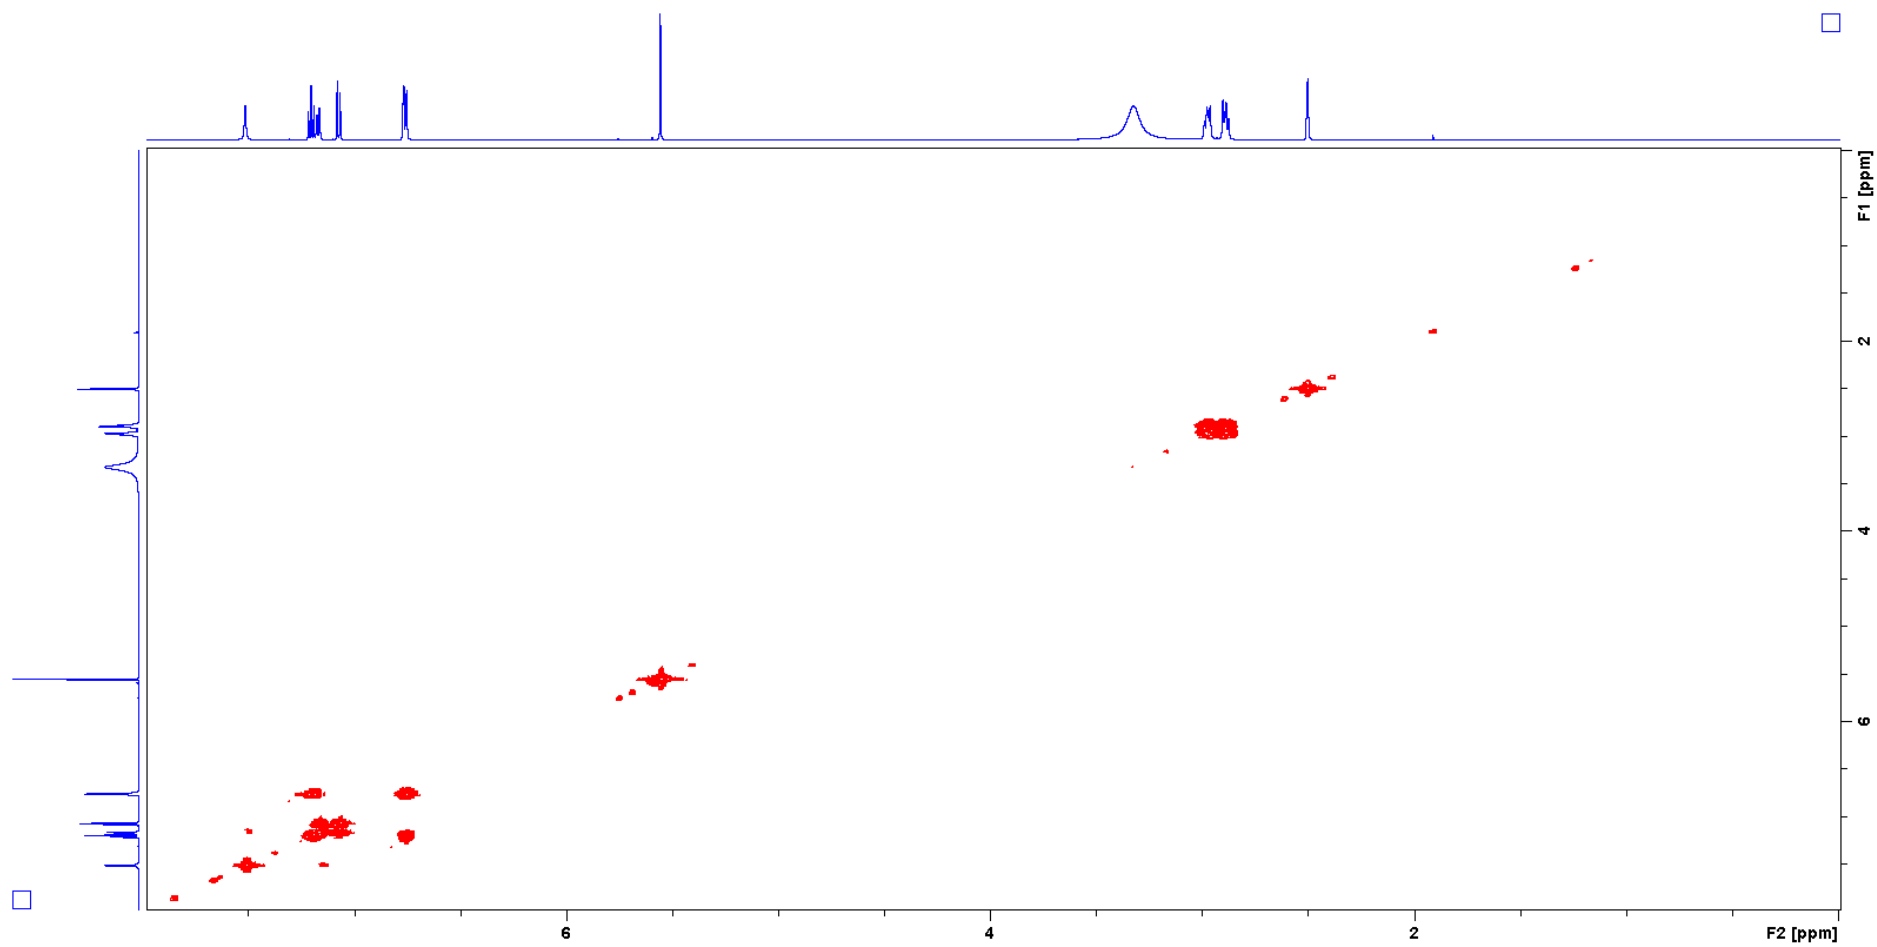

Figure S4. <sup>1</sup>H-<sup>1</sup>H COSY NMR spectrum of compound 51.

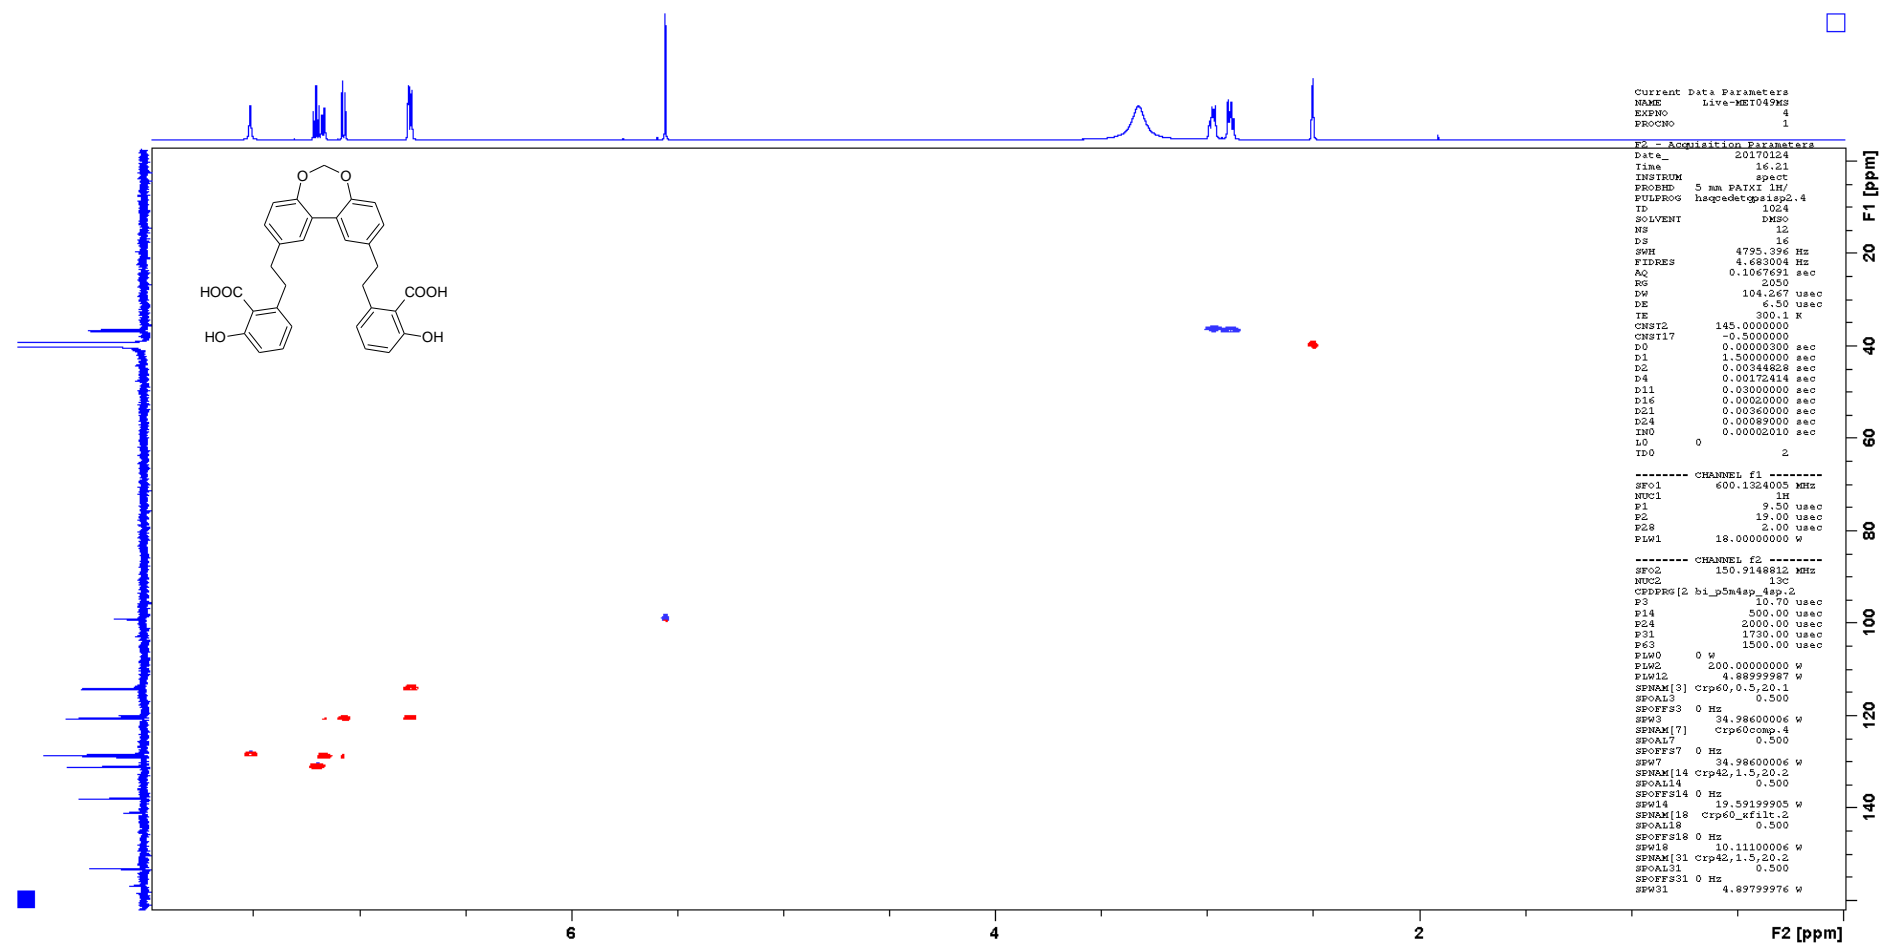Figure S5.  $^1\text{H}$ - $^{13}\text{C}$  HSQC NMR spectrum of compound 51.

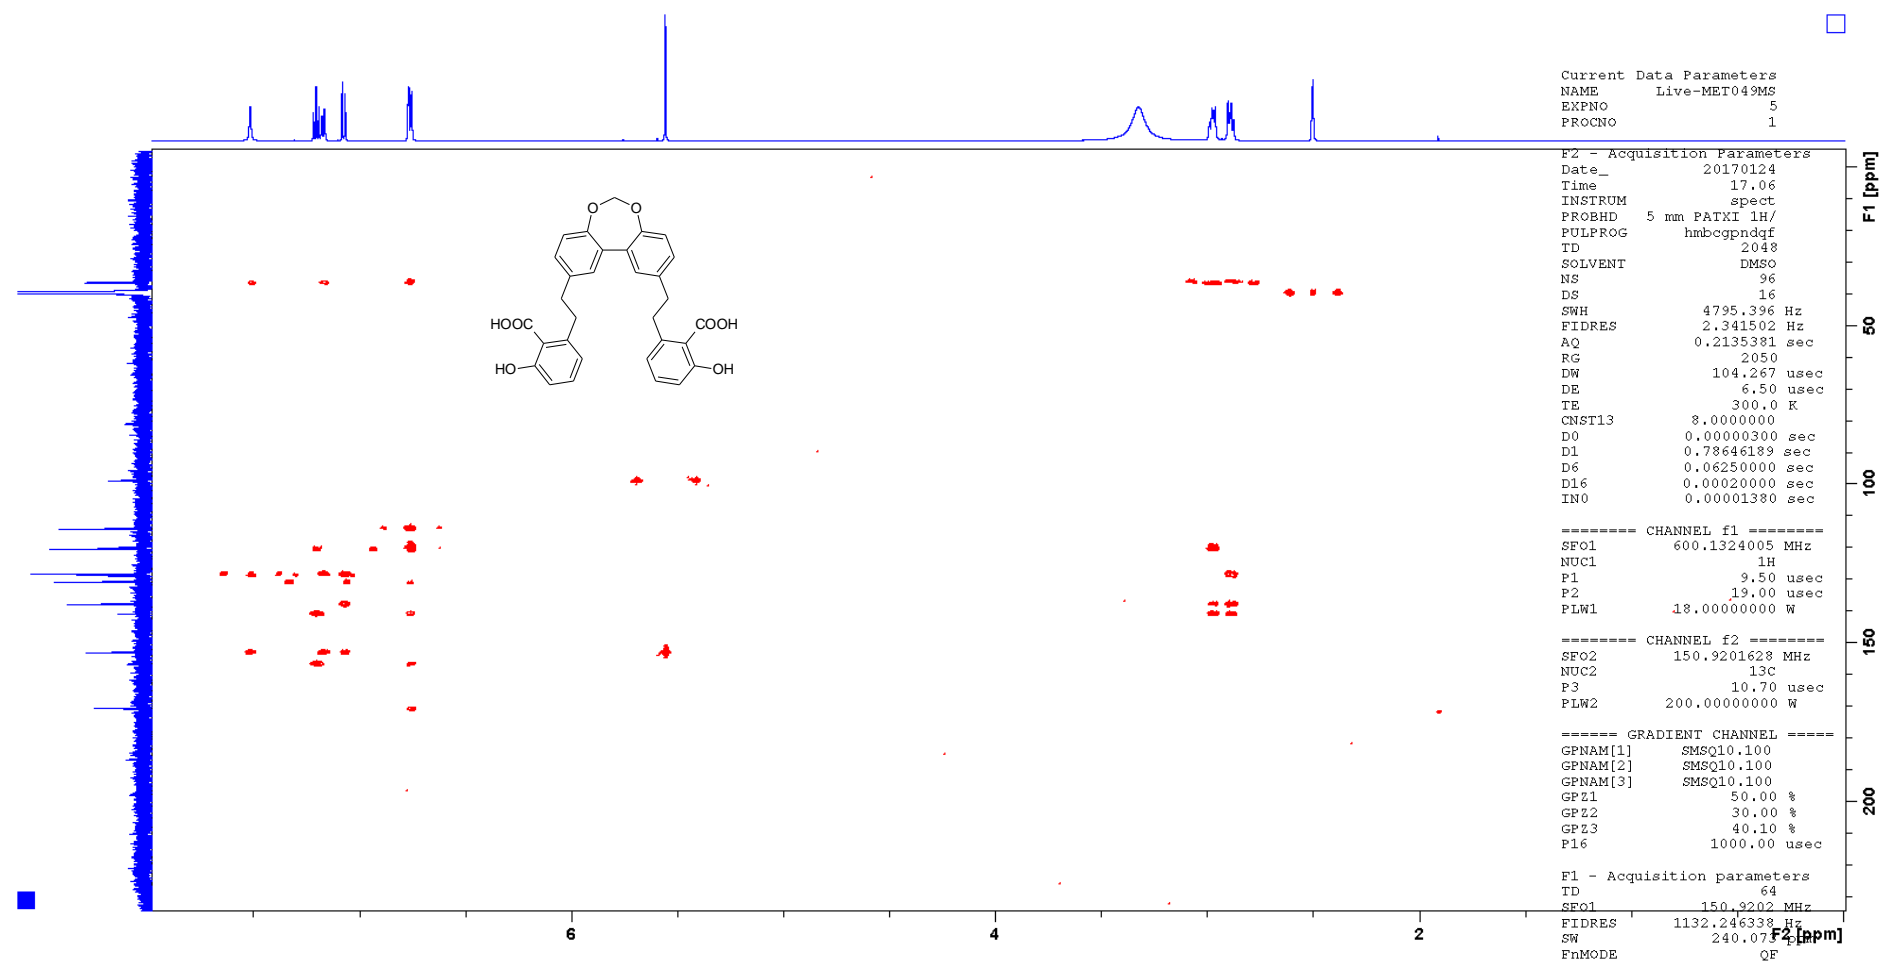Figure S6. <sup>1</sup>H-<sup>13</sup>C HMBC NMR spectrum of compound 51.

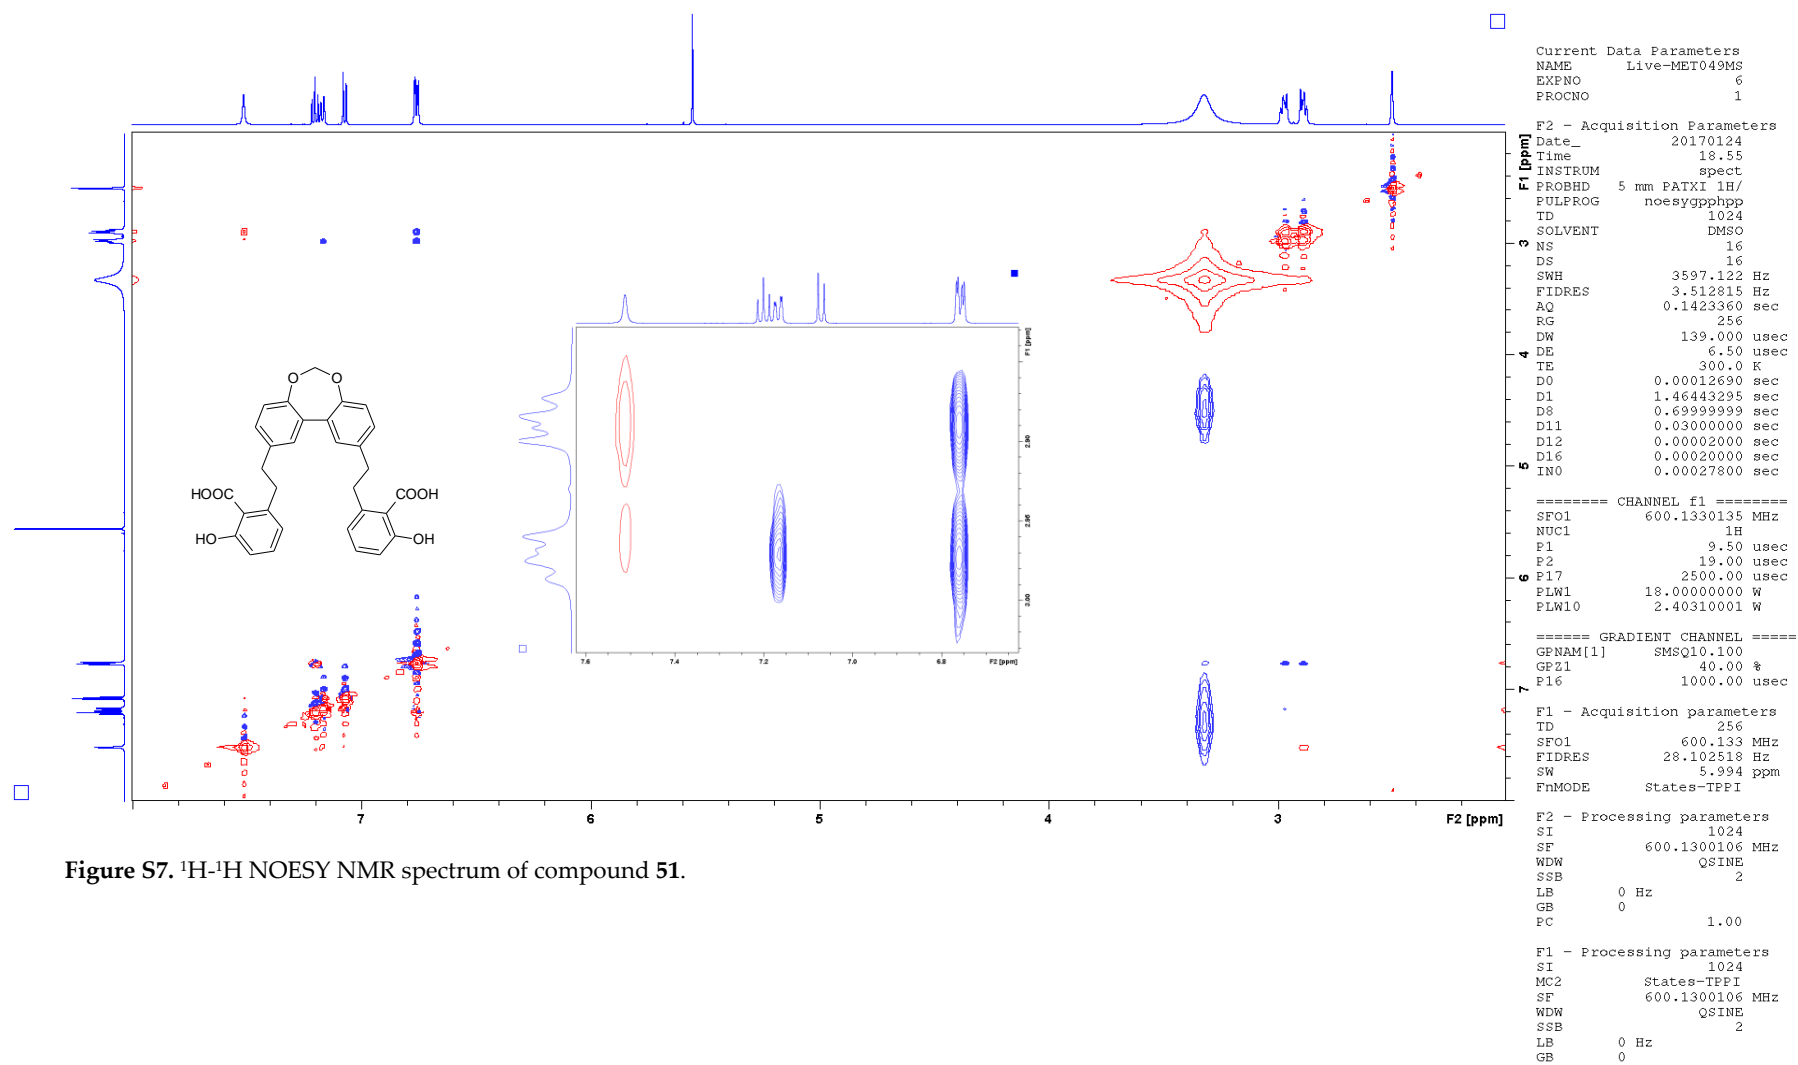



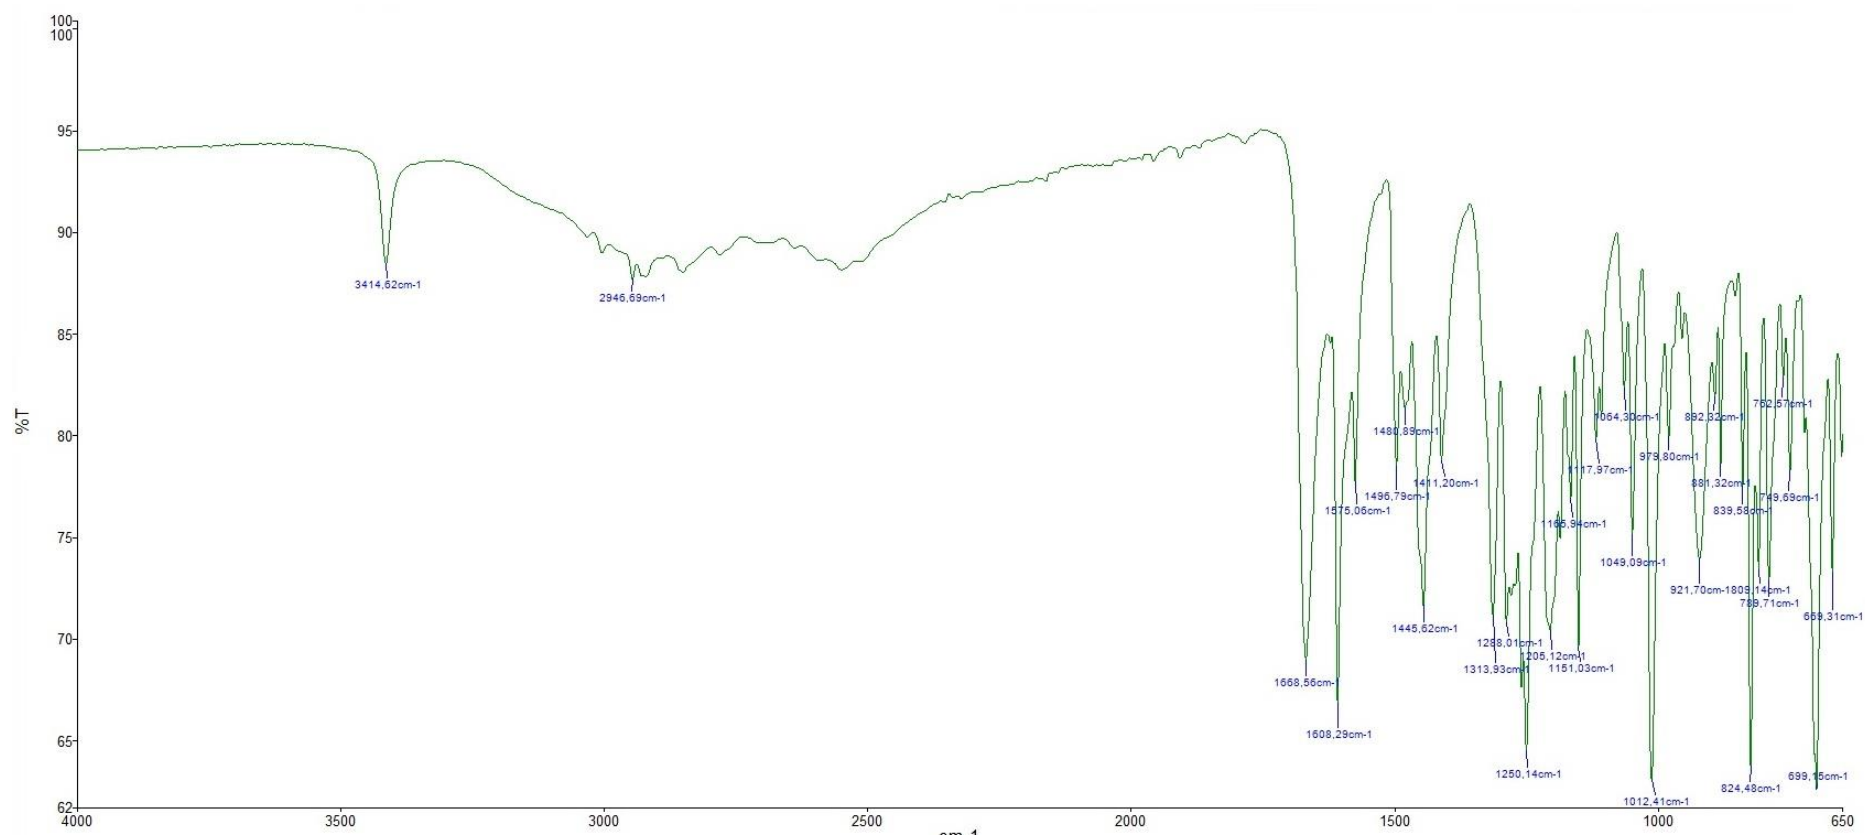

Figure S8. Infrared spectrum of compound 51.

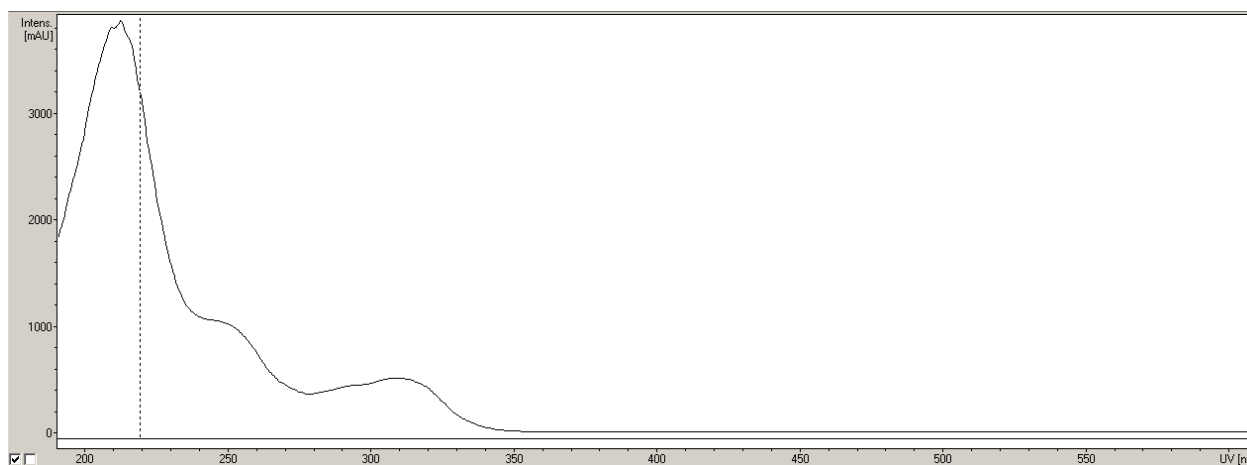

**Figure S9.** Ultraviolet spectrum of compound **51** ( $\lambda_1= 212.50$  nm,  $\lambda_2= 247.5$  nm,  $\lambda_3= 308.50$  nm).

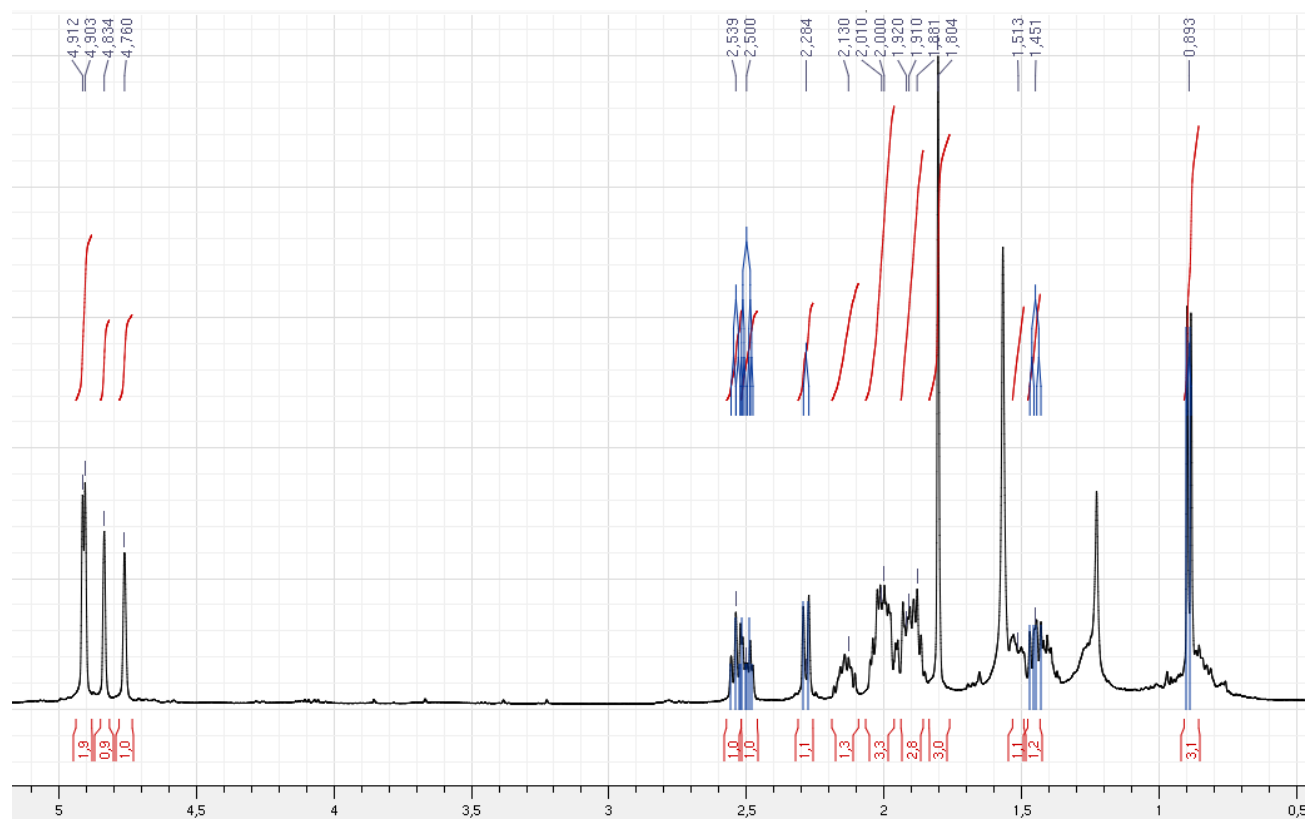

Figure S10. <sup>1</sup>H-NMR (500 MHz, CDCl<sub>3</sub>) spectrum of compound 23.

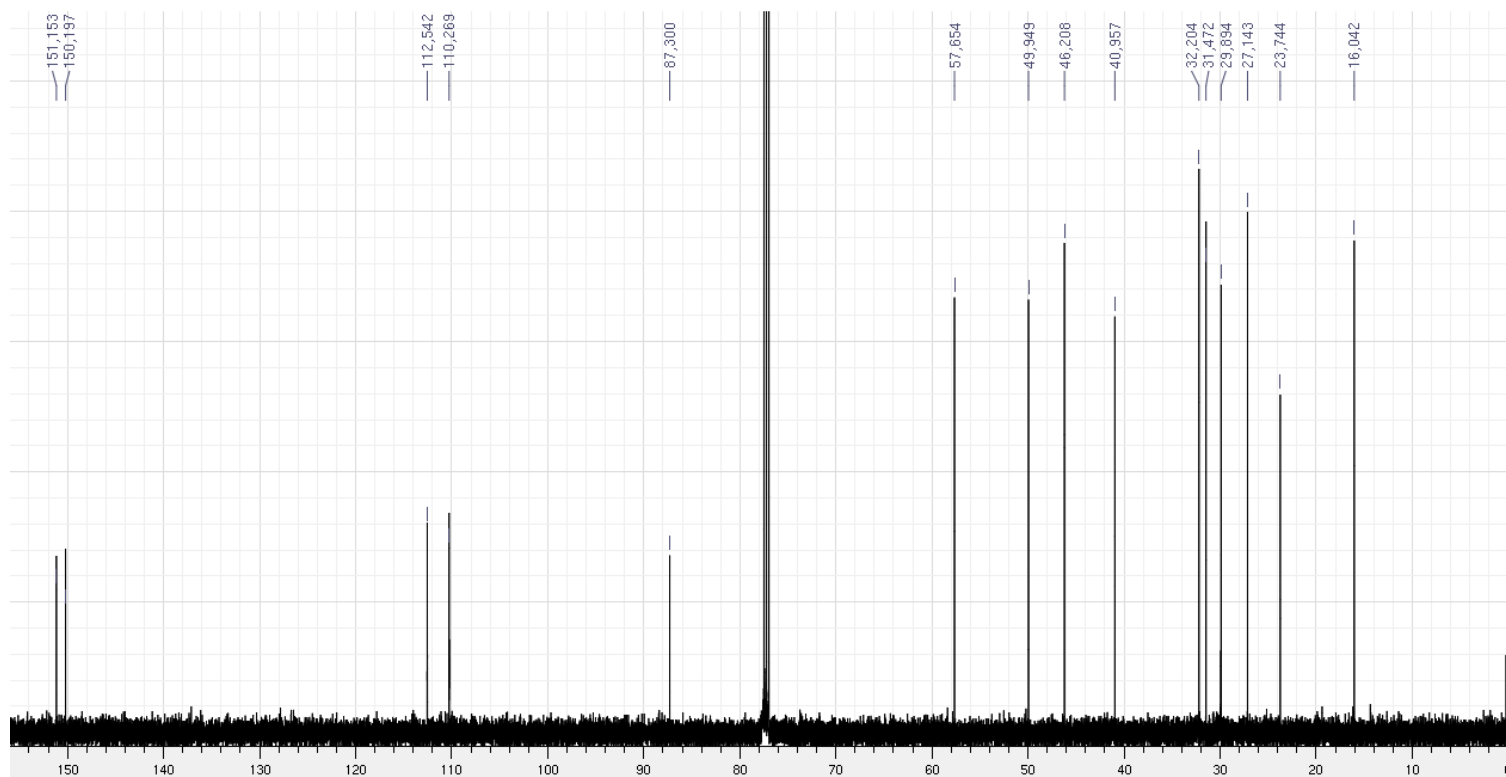

Figure S11. <sup>13</sup>C-NMR (125 MHz, CDCl<sub>3</sub>) spectrum of compound 23.

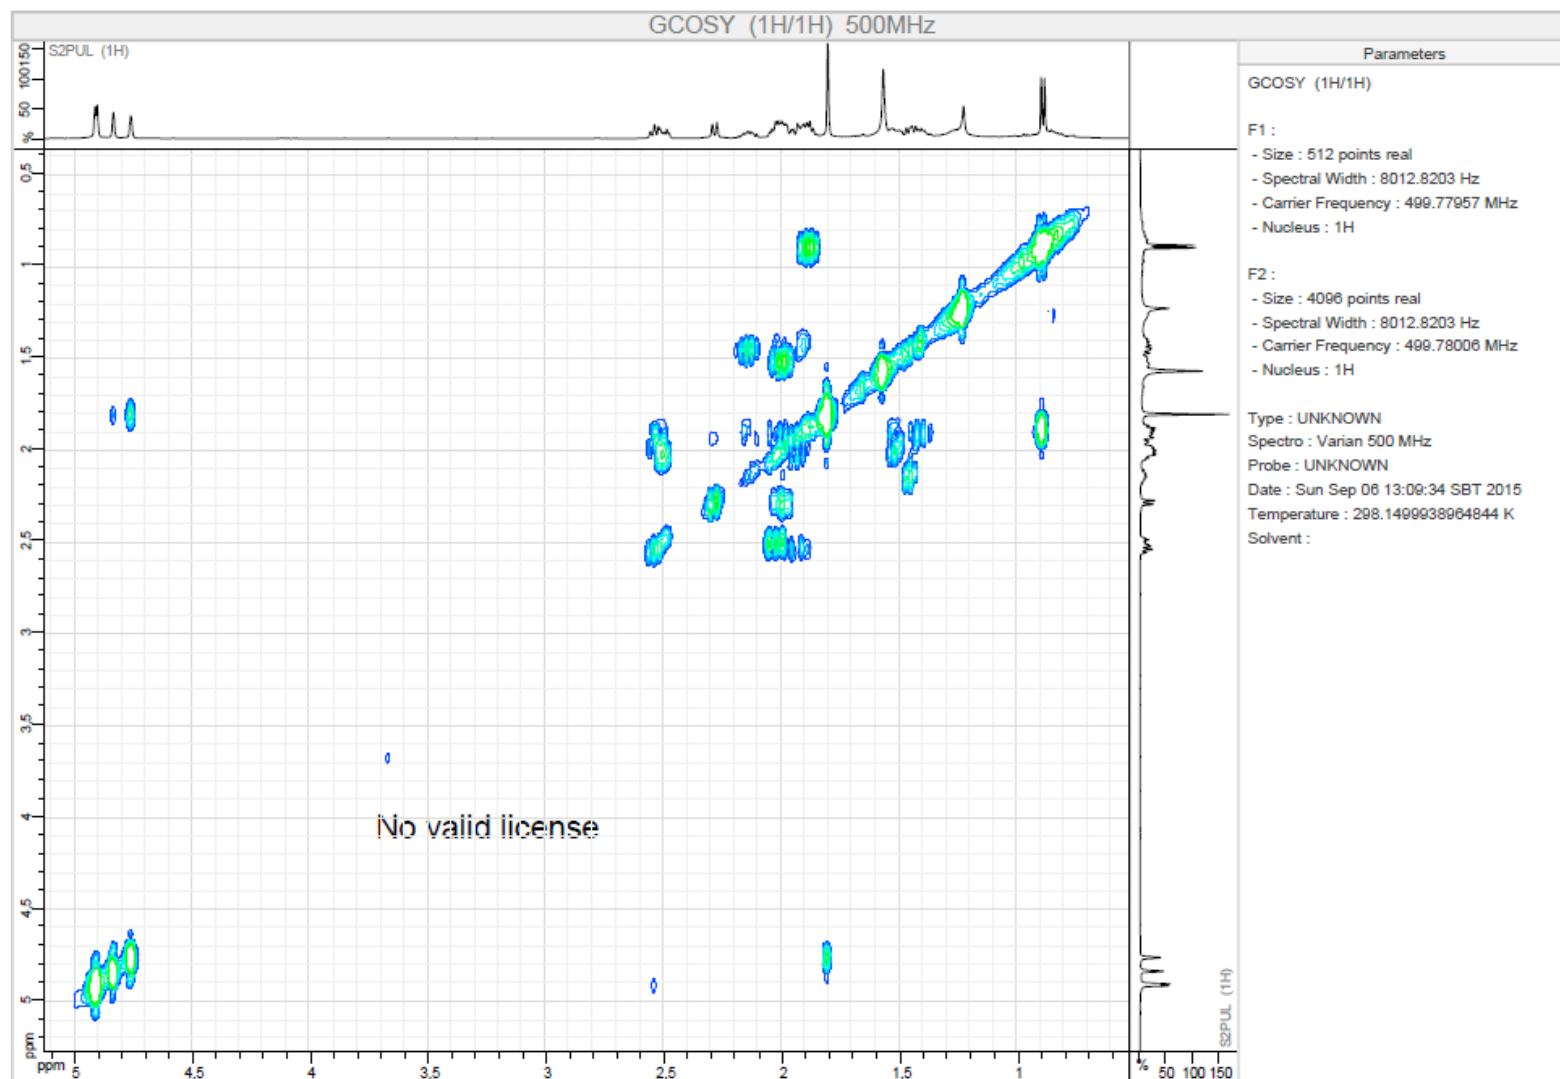

Figure S12.  $^1\text{H}$ - $^1\text{H}$  COSY NMR spectrum of compound 51.

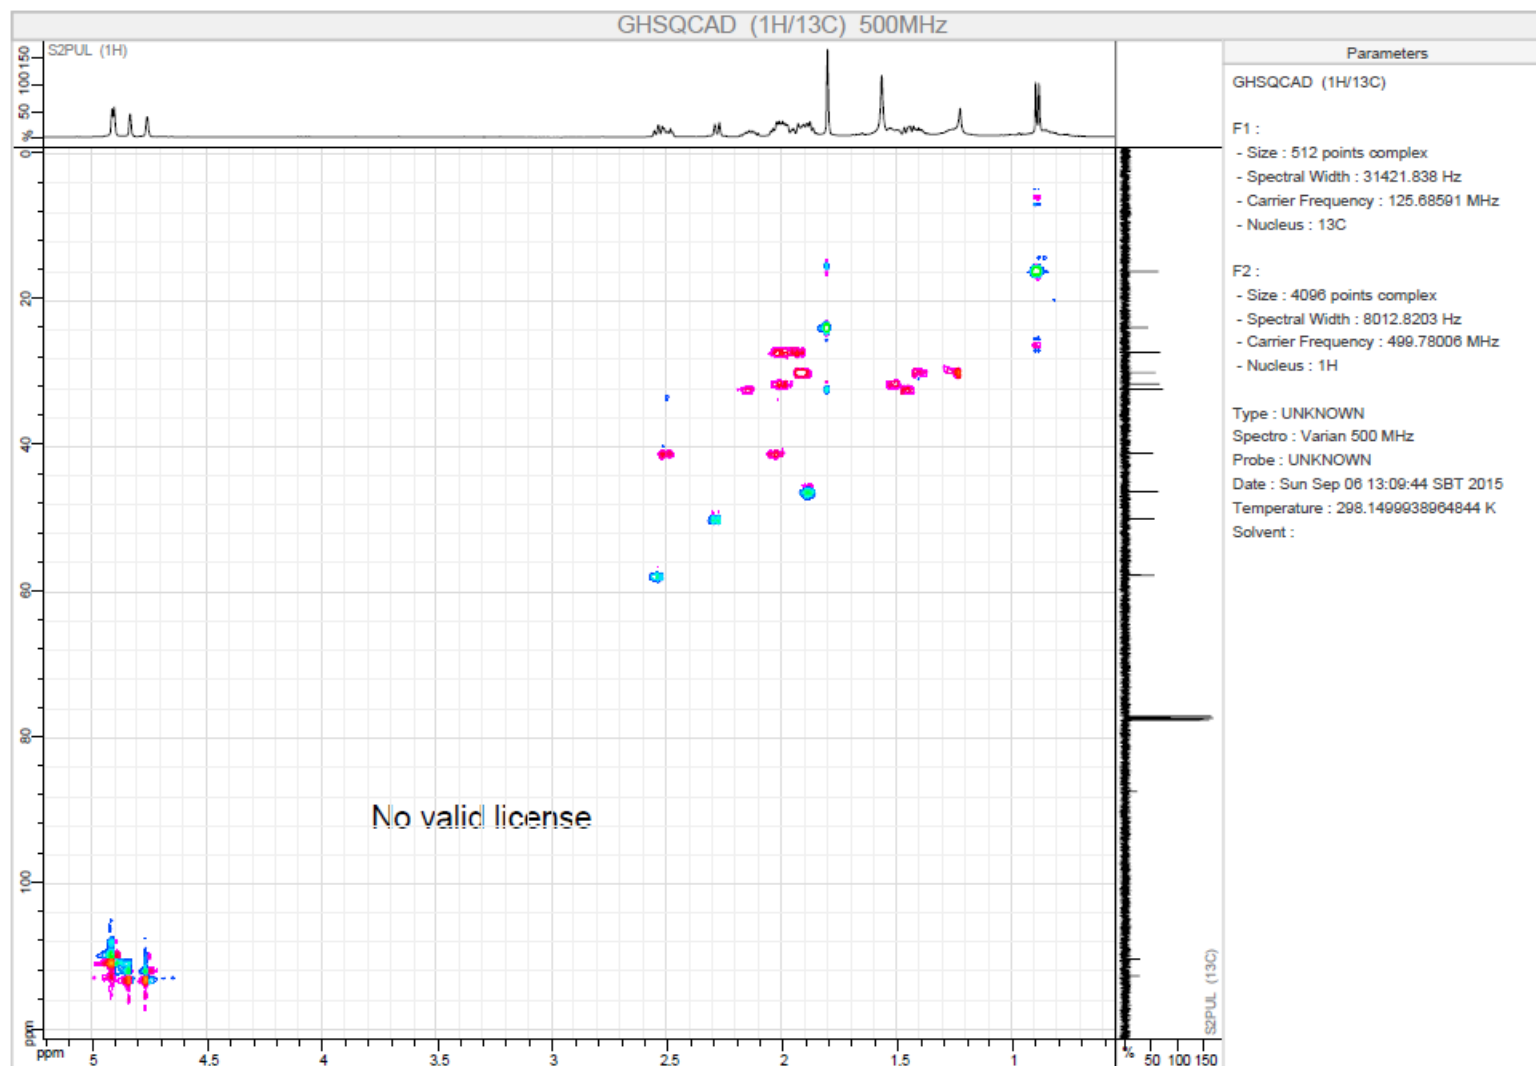

Figure S13.  $^1\text{H}$ - $^{13}\text{C}$  HSQC NMR spectrum of compound 23.

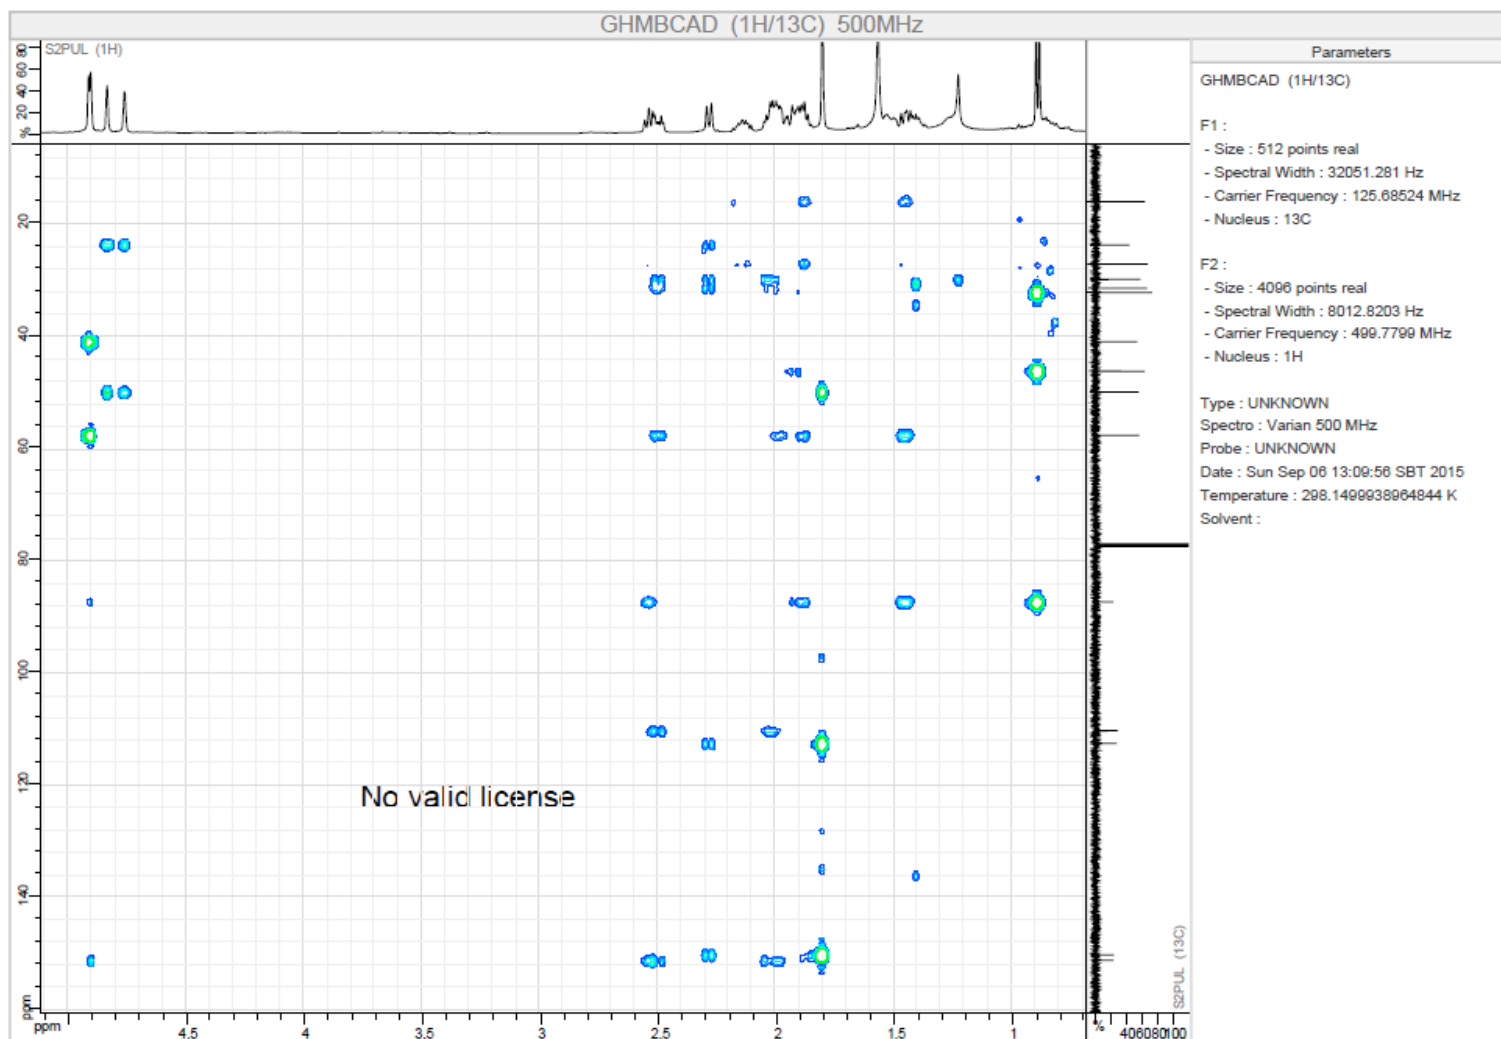

Figure S14.  $^1\text{H}$ - $^{13}\text{C}$  HMBC NMR spectrum of compound 23.

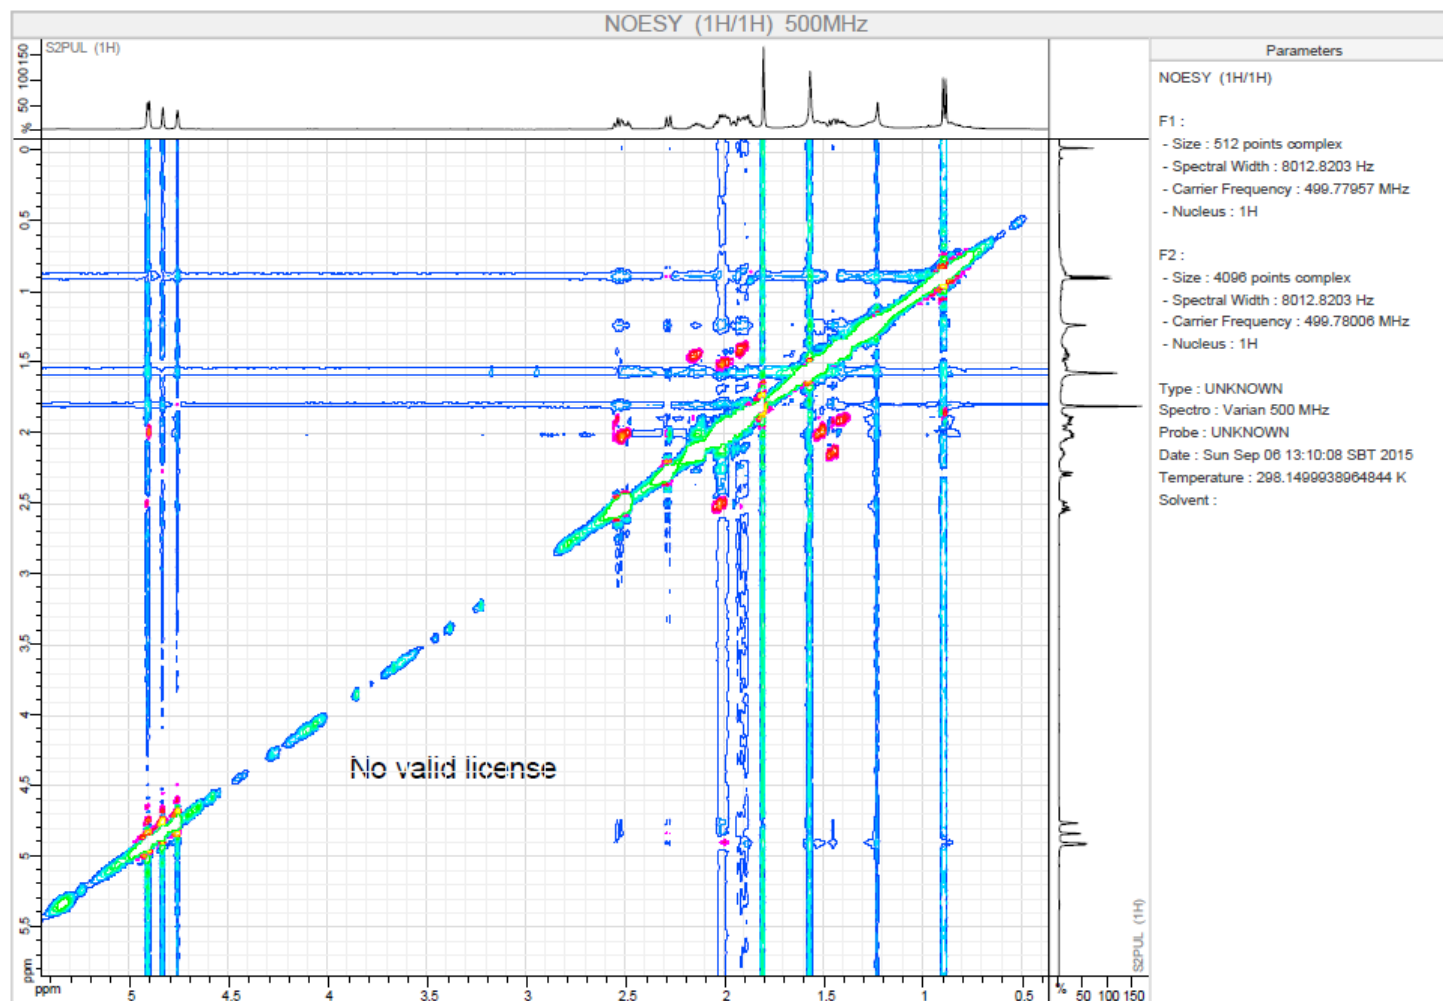

Figure S15.  $^1\text{H}$ - $^1\text{H}$  NOESY NMR spectrum of compound 23.



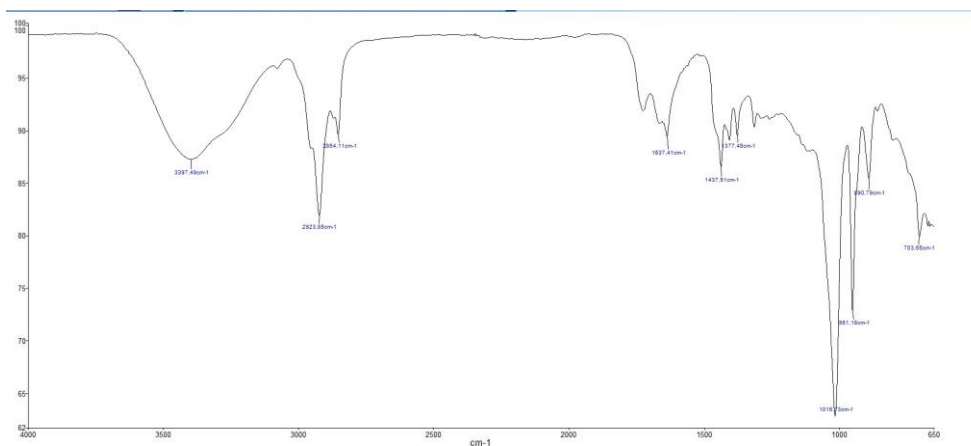

**Figure S16.** Infrared spectrum of compound **23**.

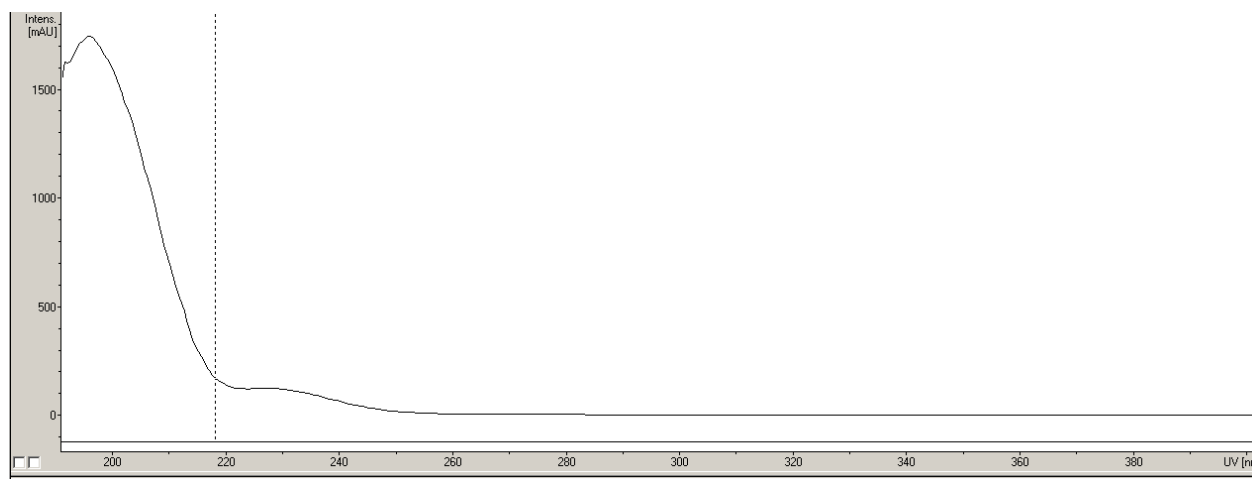

**Figure S17.** Ultraviolet spectrum of compound **23**.
